# Supplementary material
Source: PubMed Central journal article supplement (PMC7299874)
Supplement: mmc1.pdf [file mmc1.pdf]

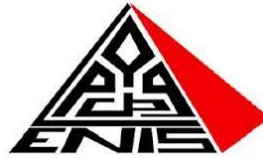

**Sfax University**  
**The National Engineering School**  
**ENIS**

## **Evidence of Proofreading and Linguistic Check Certificate**

June 07<sup>th</sup>, 2020

To Whom it May Concern

I, Abdelmajid DAMMAK, Associate Professor in English Language, Responsible for the Laboratory of Languages and Researchers' Training in reading and writing of scientific papers at the ENIS school of engineers, Sfax, Tunisia, affirm that I have undertaken the proofreading, verification and correction of the manuscript entitled «**How the cryptocurrency market has performed during COVID 19? A multifractal analysis**» written by **Dr Emna MNIF, Pr Anis JARBOUI, Pr Khaireddine MOUAKHAR** and that the manuscript is now mistake free and suitable for publication.

This certificate was delivered upon request to the concerned researchers.

Abdelmajid DAMMAK

Responsible for English Language Teaching and

Researchers' Training ENIS, Sfax

*AbdelmajidDammak*

<http://www.enis.rnu.tn>

**Adresse:** Route de la Soukra km 4 - 3038 sfax

**Tél:** +216 70 258 520 / **Fax:** +216 74 275 595

**Email :** [webmaster@enis.tn](mailto:webmaster@enis.tn)
